# Supplementary material
Source: PubMed Central journal article supplement (PMC5104200)
Supplement: NIHMS825304-supplement-Supporting_Tables.pdf [file NIHMS825304-supplement-Supporting_Tables.pdf]

## SUPPORTING INFORMATION-TABLES

### Factorial Combinations of Protein Interactions Generate a Multiplicity of Florigen Activation Complexes in Wheat and Barley

Chengxia Li, Huiqiong Lin and Jorge Dubcovsky

**Table S1** Primers used for yeast two-hybrid constructs (restriction sites are underlined)

| Constructs                       | Primer sequences                                                       | Function       | Cloning Strategy            |
|----------------------------------|------------------------------------------------------------------------|----------------|-----------------------------|
| pGBKT7-TaFT1                     | <u>CGGAATTC</u> ATGGCCGGGAGGGACAGGG<br>CCGTCGACGTCAATTGTACATCCTCCTGC   | Bait           | <i>EcoRI</i> & <i>Sall</i>  |
| pGADT7-TaFT1                     | <u>CGGAATTC</u> ATGGCCGGGAGGGACAGGG<br>CCCTCGAGGTCAATTGTACATCCTCCTGC   | Prey           | <i>EcoRI</i> & <i>XhoI</i>  |
| pGBKT7-TaFT2                     | CCCATATGATGGTGGGGAGCGGCATG<br><u>ACGAATTC</u> TACATCCTTCTCCCGCC        | Bait           | <i>NdeI</i> & <i>EcoRI</i>  |
| pGADT7-TaFT2                     | CCCATATGATGGTGGGGAGCGGCATG<br><u>ACGAATTC</u> TACATCCTTCTCCCGCC        | Prey           | <i>NdeI</i> & <i>EcoRI</i>  |
| pGBKT7-HvFT3<br>pGADT7-HvFT3     | CCCATATGTCTGCAGCGGATCCATTG<br><u>CCGAATTC</u> CCTCCCTTGAGAACTTTCTG     | Bait &<br>Prey | <i>NdeI</i> & <i>EcoRI</i>  |
| pGBKT7-HvFT4<br>pGADT7-HvFT4     | CCCATATGGCGAATGACTCCTTGAC<br><u>CCGAATTC</u> GGTGAACCTCCTCCCGCCGG      | Bait &<br>Prey | <i>NdeI</i> & <i>EcoRI</i>  |
| pGBKT7-HvFT5<br>pGADT7-HvFT5     | CCCATATGTCGGTAGTGGATCCCTTG<br><u>CCGAATTC</u> CCTCCCTTGAGAACTTTCCGG    | Bait &<br>Prey | <i>NdeI</i> & <i>EcoRI</i>  |
| pGBKT7-HvFT6<br>pGADT7-HvFT6     | CCCATATGTCAAGGGAGGCACTTGCC<br><u>CCGAATTC</u> TCTAATGTATCGCCTGCCTCC    | Bait &<br>Prey | <i>NdeI</i> & <i>EcoRI</i>  |
| pGBKT7-TaFTL1<br>pGADT7-TaFTL1   | CCCATATGTCGAGGTGCGAGGGACCCGC<br><u>CCGAATTC</u> CCTGTACCACCTCCGGCCAC   | Bait &<br>Prey | <i>NdeI</i> & <i>EcoRI</i>  |
| pGADT7-TaFDL2                    | <u>CGGAATTC</u> ATGGCAGGCCCTTTCATGG<br>CCCTCGAGGTCAAACAGGGGCAGAACT     | Prey           | <i>EcoRI</i> & <i>XhoI</i>  |
| pGADT7-TaFDL6                    | AAGGATCCATATGAGCTCTGAAGCGGTG<br>CCCTCGAGGTGAGAATGAGGTCGATCT            | Prey           | <i>BamHI</i> & <i>XhoI</i>  |
| pGADT7-TaFDL13                   | <u>CGGAATTC</u> ATGTCGTGGGAGGAGCCC<br>ATGGATCCATTAATAATTACCCATGC       | Prey           | <i>EcoRI</i> & <i>BamHI</i> |
| pGADT7-TaFDL15                   | <u>CGGAATTC</u> ATGTCGTGGGAGGAGCCC<br>ATGGATCCACTAGAACTGAGTGGACGA      | Prey           | <i>EcoRI</i> & <i>BamHI</i> |
| pGADT7-HvFDL1                    | CCCATATGGGGAGTCGGAAAATGGCGTC<br><u>CCGAATTC</u> ATCCGAAGAGGCTAAACTTGC  | Prey           | <i>NdeI</i> & <i>EcoRI</i>  |
| pGADT7-HvFDL2                    | CCCATATGGGAACTCAGGCAATGCCGTC<br><u>CCGAATTC</u> GAAAGCTGGCCGAGTTCCTCCG | Prey           | <i>NdeI</i> & <i>EcoRI</i>  |
| pGBKT7-14-3-3A<br>pGADT7-14-3-3A | CCCATATGTCTACCGCTGAGGCAACC<br><u>CCGAATTC</u> GTGCCCTCTCCCTCAGGC       | Bait &<br>Prey | <i>NdeI</i> & <i>EcoRI</i>  |

| <b>Constructs</b>                                                                  | <b>Primer sequences</b>                                                                                      | <b>Function</b> | <b>Cloning Strategy</b>    |
|------------------------------------------------------------------------------------|--------------------------------------------------------------------------------------------------------------|-----------------|----------------------------|
| pGBKT7-14-3-3B<br>pGADT7-14-3-3B                                                   | CCCATATGGCGCAGCCTGCTGAGC<br>CCGAATTCCTGTCCATCTCCAGATTCACC                                                    | Bait &<br>Prey  | <i>NdeI</i> & <i>EcoRI</i> |
| pGBKT7-14-3-3C<br>pGADT7-14-3-3C                                                   | CCCATATGACGGCACCAGCGGAGC<br>CCGATATCCCCTGCCCTCGCTGGAGTCATG                                                   | Bait &<br>Prey  | <i>NdeI</i> & <i>BamHI</i> |
| pGBKT7-14-3-3D<br>pGADT7-14-3-3D                                                   | CCCATATGGCAAAGGCAGCGGCAACGAG<br>CCGAATTCCTGTCTCATCTCAGGCTTGC                                                 | Bait &<br>Prey  | <i>NdeI</i> & <i>EcoRI</i> |
| pGBKT7-14-3-3E<br>pGADT7-14-3-3E                                                   | CCCATATGTGCGCCAGCAGAGCCGACGCG<br>CCGAATTCCTGTCCGTCTCCAGATTCT                                                 | Bait &<br>Prey  | <i>NdeI</i> & <i>EcoRI</i> |
| pGBKT7-14-3-3H<br>pGADT7-14-3-3H                                                   | CCCATATGGAGGAGAGGGGGAAGGTGG<br>CCGAATTCCTCCCTCCATATCGATGTCGC                                                 | Bait &<br>Prey  | <i>NdeI</i> & <i>EcoRI</i> |
| pDONR-TaFDL2                                                                       | GGGGACAAGTTTGTACAAAAAAGCTGCCACCATGGCAGGCCCTTTCATGGC<br>GGGGACCACTTTGTACAAGAAAGCTGAACGAACAGGGGCAGAACTTGTTTC   | Entry           | Gateway cloning            |
| pDONR-TaFT1                                                                        | GGGGACAAGTTTGTACAAAAAAGCTGCCACCATGGCCGGGAGGGACAGGG<br>GGGGACCACTTTGTACAAGAAAGCTGAACGATTGTACATCTCTGCCAC       | Entry           | Gateway cloning            |
| pDONR-14-3-3A<br>LAW10-14-3-3A<br>LAW11-14-3-3A<br>pGBKc-14-3-3A<br>pGADCg-14-3-3A | GGGGACAAGTTTGTACAAAAAAGCTGCCACCATGTCTACCGCTGAGGCAACC<br>GGGGACCACTTTGTACAAGAAAGCTGAACGGTGCCCTCTCCCTCAGGCTTTG | Bait &<br>Prey  | Gateway cloning            |
| pDONR-14-3-3B<br>LAW10-14-3-3B<br>LAW11-14-3-3B<br>pGBKc-14-3-3B<br>pGADCg-14-3-3B | GGGGACAAGTTTGTACAAAAAAGCTGCCACCATGGCGCAGCCTGCTGAGC<br>GGGGACCACTTTGTACAAGAAAGCTGAACGCTGTCCATCTCCAGATTCACC    | Bait &<br>Prey  | Gateway cloning            |
| pDONR-14-3-3C<br>LAW10-14-3-3C<br>LAW11-14-3-3C<br>pGBKc-14-3-3C<br>pGADCg-14-3-3C | GGGGACAAGTTTGTACAAAAAAGCTGCCACCATGACGGCACCAGCGGAGC<br>GGGGACCACTTTGTACAAGAAAGCTGAACGCTGCCCTCGCTGGAGTCATG     | Bait &<br>Prey  | Gateway cloning            |
| pDONR-14-3-3D<br>LAW10-14-3-3D<br>LAW11-14-3-3D<br>pGBKc-14-3-3D<br>pGADCg-14-3-3D | GGGGACAAGTTTGTACAAAAAAGCTGCCACCATGGCAAAGGCAGCGGCAAC<br>GGGGACCACTTTGTACAAGAAAGCTGAACGCTGTCTCATCTCAGGCTTGC    | Bait &<br>Prey  | Gateway cloning            |
| pDONR-14-3-3E<br>LAW10-14-3-3E<br>LAW11-14-3-3E<br>pGBKc-14-3-3E<br>pGADCg-14-3-3E | GGGGACAAGTTTGTACAAAAAAGCTGCCACCATGTGCCAGCAGAGCCGACGCG<br>GGGGACCACTTTGTACAAGAAAGCTGAACGCTGTCCGTCTCCAGATTCT   | Bait &<br>Prey  | Gateway cloning            |

**Table S2** Primers used in mutant generation by site-directed mutagenesis (mutations underlined)

| <b>Mutant</b> | <b>Primer sequences</b>                                                                             |
|---------------|-----------------------------------------------------------------------------------------------------|
| FT1-G33E      | CAACCTCAGGGTGACCTTC <u>GAGA</u> ACAGGACCGTGTCC<br>GGACACGGTCCTGTTCT <u>CGA</u> AGGTCACCCTGAGGTTG    |
| FT1-R62K      | GGTGGCGGCAATGAGATGA <u>AGAC</u> CTTCTACACACTC<br>GAGTGTGTAGAAGGTC <u>TTC</u> ATCTCATTGCCGCCACC      |
| FT1-T66I      | GAGATGAGGACCTTCTACATACTCGTGATGGTAGACCC<br>GGGTCTACCATCACGAGTAT <u>GT</u> AGAAAGGTCCTCATCTC          |
| FT1-P77S      | GACCCAGATGCTCCAAGTTC <u>CAAG</u> CGATCCCAACCTTAG<br>CTAAGGTTGGGATCGCTT <u>GAA</u> CTTGGAGCATCTGGGTC |
| FT1-Y85H      | GATCCCAACCTTAGGGAGCATCTCCACTGGCTTGTG<br>CACAAGCCAGTGGAGAT <u>GCT</u> CCCTAAGGTTGGGATC               |
| FT1-P94L      | GGCTTGTGACAGATATCCT <u>CGG</u> TACAACCTGGTGCCTCG<br>CGAGGCCACAGTTGTAC <u>CGA</u> GATATCTGTACAAGCC   |
| FT1-F101A     | GGTACAACCTGGTGCCTCGGCCGGGCAGGAAGTGATGTG<br>CACATCACTTCTGCCCGCCGAGGCCACAGTTGTACC                     |
| FT1-R130K     | CTCTTCCAGCAGCTCGGCA <u>AGC</u> AGACCGTGTACGC<br>GCGTACACGGTCTGCTT <u>GCC</u> GAGCTGCTGGAAGAG        |
| TaFDL2-S130A  | GTATCAACTCCGGAGAACAAGTGCTGCCCTGTT<br>AACAGGGGCAGCACTTGTCTCCGGAGTTGATAC                              |
| TaFDL6-S310A  | GGCATCTTCGGAGAACGAGAGCGACCTCATTTC<br>GAATGAGGTCGCTCTCGTTCTCCGAAGATGCC                               |
| TaFDL6-T311A  | CTTCGGAGAACGAGATCGGCCTCATTCTGACCTCGAG<br>CTCGAGGTCAGAATGAGCCGATCTCGTTCTCCGAAG                       |
| TaFDL6-S312A  | CGGAGAACGAGATCGACCGCATTCTGACCTCGAG<br>CTCGAGGTCAGAATGCGGTCGATCTCGTTCTCCG                            |
| TaFDL6-Tri-M  | GGCATCTTCGGAGAACGAGAGCGGCCGATTCTGACCTCGAG<br>CTCGAGGTCAGAATGCGGCCGCTCTCGTTCTCCGAAGATGCC             |
| TaFDL15-S131A | GCCCACACAGGAGAACCCTCGGCCACTCAGTTC<br>GAACTGAGTGGCCGAGGTTCTCCTGTGTGGGC                               |
| HvFDL1-S333A  | GTATCAACTCAGGAGAACATGCGCGGCCGCTTTC<br>GAAAGCGGCCGCGCATGTTCTCCTGAGTTGATAC                            |
| HvFDL2-S216   | GAACCAGCTCCGCCGGAGGAACGCGGCCAGCTTC<br>GAAGCTGGCCGCTTCTCCGCCGAGCTGGTTC                               |

**Table S3** Primers used in the Q-RT-PCR analysis

| <b>Target gene</b> | <b>Primers</b>                                   | <b>Efficiency</b> | <b>References</b>   |
|--------------------|--------------------------------------------------|-------------------|---------------------|
| <i>Ta14-3-3A</i>   | CCATTGAGCAGAAGGAGGAG<br>TCAGTTTCAATCCTGGTACGG    | 94%               | This study          |
| <i>Ta14-3-3B</i>   | CCACTGCTCCAGAGTCCAAG<br>GTTCTCAGCAGCATCCTTCC     | 97%               | This study          |
| <i>Ta14-3-3C</i>   | CTGCTCGAAACCCACCTTGT<br>TTCTCAGCAGCATCCTTCT      | 96%               | This study          |
| <i>Ta14-3-3D</i>   | GGTACGAGGAGATGGTCGAG<br>CGCGACTGAGAGCAGGTTCC     | 104%              | This study          |
| <i>Ta14-3-3E</i>   | TCATGCAGCTCCTGCGTGAC<br>GCTGGGGCTTCCTTAATCTC     | 102%              | This study          |
| <i>TaFDL2</i>      | CGAGGAAGCAGGCTTACACT<br>CCGGAGTTGATACTTGGGTTC    | 99%               | Li & Dubcovsky 2008 |
| <i>TaFDL6</i>      | GTTGCAATCCCTTCGACAAT<br>GCTCGTTTGTGTAGGCCTGT     | 97%               | Li & Dubcovsky 2008 |
| <i>TaFDL4</i>      | CAGAGCATGAACCTCGACGA<br>ACACCTCATCCACCGTCTTC     | 106%              | This study          |
| <i>TaFDL5</i>      | GAAGCGGATGATCAAGAACC<br>TGCTCGTTCTCCTCTTCCAG     | 100%              | This study          |
| <i>TaFDL15</i>     | AAGAGAGCCTACACGCAGGA<br>GCTTGAGCTTGAGGTTGTCC     | 104%              | This study          |
| <i>ACTIN</i>       | ACCTTCAGTTGCCAGCAAT<br>CAGAGTCGAGCACAAATACCAGTTG | 98%               | Uauy, et al., 2006  |
